# Supplementary material for: Building a hybrid nanocomposite assembly of gold nanowires and thienyl-derivative fullerenes to enhance electron transfer in photovoltaics
Source: Royal Society of Chemistry journal article supplement (doi:10.1039/c3ta01416a), 2013-01-01
Supplement: c3ta01416a.pdf [file c3ta01416a.pdf]

# **Building a hybrid nanocomposite assembly of gold nanowires and thienyl-derivative fullerenes to enhance electron transfer in photovoltaics**

## **Supporting Information**

*Yong Seok Kim<sup>a</sup>, Byung-Kwan Yu<sup>a,c</sup>, Jeong Won Kim<sup>a</sup>, Yo-Han Suh<sup>a</sup>, Dong-Yu Kim<sup>a,c</sup>, Won Bae Kim<sup>\*a,b</sup>*

<sup>a</sup> School of Materials Science and Engineering, Gwangju Institute of Science and Technology (GIST), Gwangju, 500-712, Republic of Korea.

<sup>b</sup> Research Institute for Solar and Sustainable Energies (RISE), Gwangju Institute of Science and Technology (GIST), Gwangju, Republic of Korea.

<sup>c</sup> Heeger Center for Advanced Materials, Gwangju Institute of Science and Technology (GIST), 261 Cheomdan-gwagiro, Buk-gu, Gwangju 500-712, Republic of Korea.

**Table S1.** The Au 4f<sub>7/2</sub> binding energy of Au NW only and ThCBM-adsorbed Au NW.

|                      | Elements             | Binding Energy [eV] |
|----------------------|----------------------|---------------------|
| Au NW only           | C 1s                 | 285.00              |
|                      | Au 4f <sub>7/2</sub> | 83.77               |
| ThCBM-adsorbed Au NW | C 1s                 | 285.00              |
|                      | Au 4f <sub>7/2</sub> | 83.94               |

**Table S2.** Summarized photovoltaic parameters of bulk heterojunction solar cells using P3HT:ThCBM-adsorbed Au NW with variable concentrations of gold nanowires under AM 1.5G illumination conditions.

| Photoactive layers                                         | $J_{sc}$<br>(mA/cm <sup>2</sup> ) | $V_{oc}$<br>(V) | FF<br>(%) | PCE<br>(%) |
|------------------------------------------------------------|-----------------------------------|-----------------|-----------|------------|
| P3HT:ThCBM-adsorbed Au NW (ca.<br>1 x 10 <sup>7</sup> /ml) | 7.24                              | 0.59            | 66.2      | 2.81       |
| P3HT:ThCBM-adsorbed Au NW (ca.<br>1 x 10 <sup>8</sup> /ml) | 7.66                              | 0.61            | 67.2      | 3.12       |
| P3HT:ThCBM-adsorbed Au NW (ca.<br>1 x 10 <sup>9</sup> /ml) | 7.31                              | 0.61            | 66.5      | 2.95       |

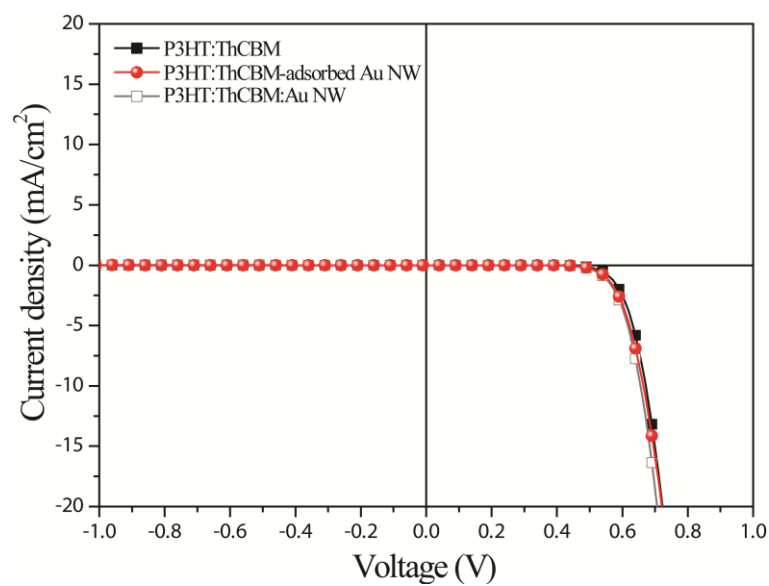

**Figure S1.** J-V characteristics of bulk heterojunction solar cells using P3HT:ThCBM, P3HT:ThCBM-adsorbed Au NW and P3HT:ThCBM:Au NW under dark conditions.

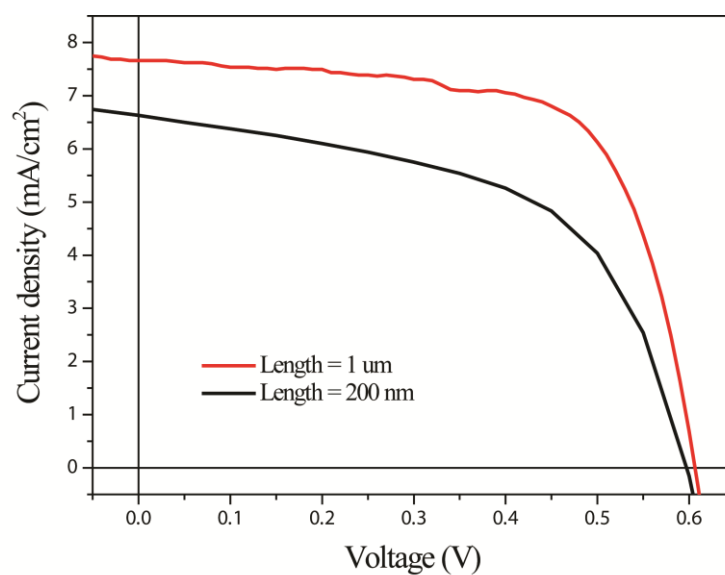

**Figure S2.** *J-V* characteristics of bulk heterojunction solar cells using P3HT:ThCBM-adsorbed Au NW with 1  $\mu\text{m}$  and 200 nm length under illumination conditions.

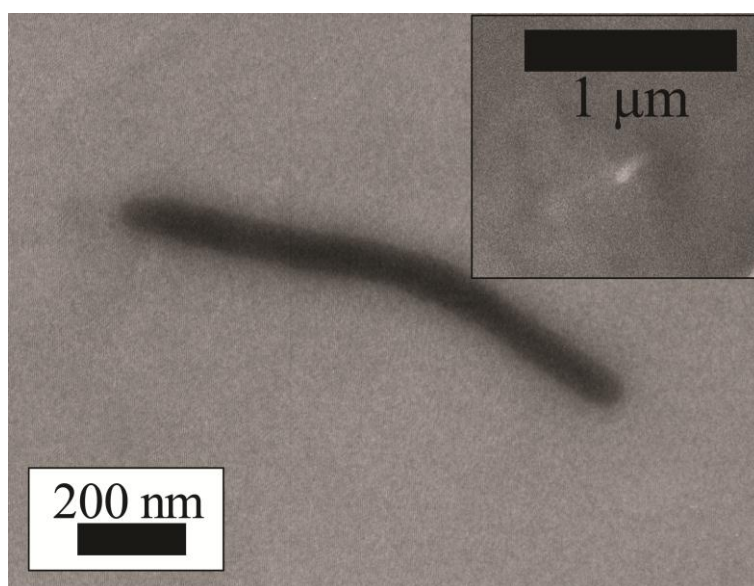

**Figure S3.** TEM image for the photoactive layer using P3HT:ThCBM-adsorbed Au NW; inset is its top-viewed SEM image.

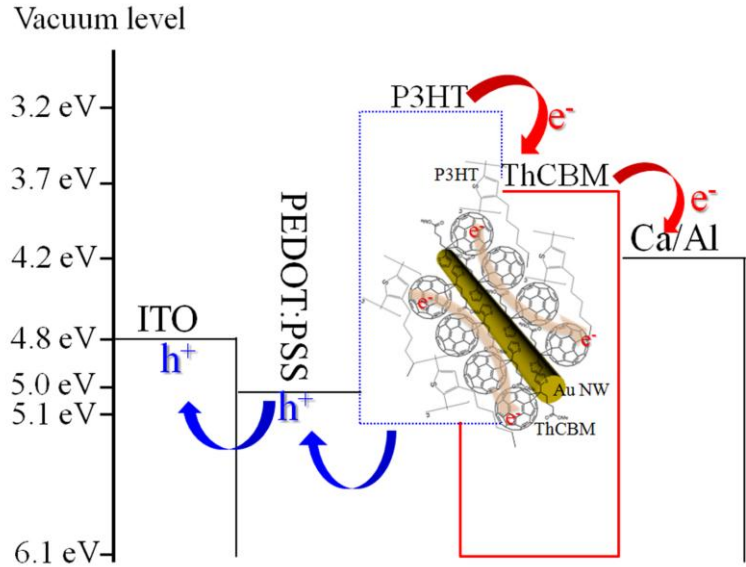

**Figure S4.** Energy level diagram of our bulk heterojunction solar cell using ThCBM-adsorbed Au NW nanocomposites.
